# Supplementary material
Source: Royal Society of Chemistry journal article supplement (doi:10.1039/d6en00176a)
Supplement: d6en00176a1.pdf [file d6en00176a1.pdf]

## Supporting Information

### **Engineered Anionic and Cationic Lignin-g-PLGA Nanoparticles for Controlled Delivery of Nano CuS in Lettuce (*Lactuca sativa*): Effects of Charge on Nutrient Uptake and Metabolic Activity**

Fannyuy V. Kewir,<sup>a</sup> Justin Gambill,<sup>b</sup> Thanida Chuacharoen,<sup>a</sup> Sumit Libi,<sup>a</sup> Mycroft Mitchel,<sup>a</sup> Omar Mendez,<sup>a</sup> Carlos E. Astete,<sup>a</sup> Zeyu Cai,<sup>c</sup> Alvaro G. Garcia,<sup>c</sup> Yi Wang,<sup>c</sup> Jordan A. Dowell,<sup>b,d</sup> Seung Soo S. Lee,<sup>e</sup> John D. Fortner,<sup>e</sup> Jason C. White,<sup>c</sup> and Cristina M. Sabliov<sup>\*a</sup>

<sup>a</sup>Department of Biological & Agricultural Engineering, Louisiana State University, LSU Ag Center, Baton Rouge, LA, 70803, USA.

<sup>b</sup>Department of Biological Sciences, Louisiana State University, Baton Rouge, LA, 70803, USA.

<sup>c</sup>Department of Analytical Chemistry, The Connecticut Agricultural Experiment Station, New Haven, CT, 06511, USA.

<sup>d</sup>Department of Plant Pathology and Crop Physiology, Louisiana State University, LSU Ag Center, Baton Rouge, LA, 70803, USA.

<sup>e</sup>Department of Chemical and Environmental Engineering, Yale University, New Haven, CT, 06511, USA.

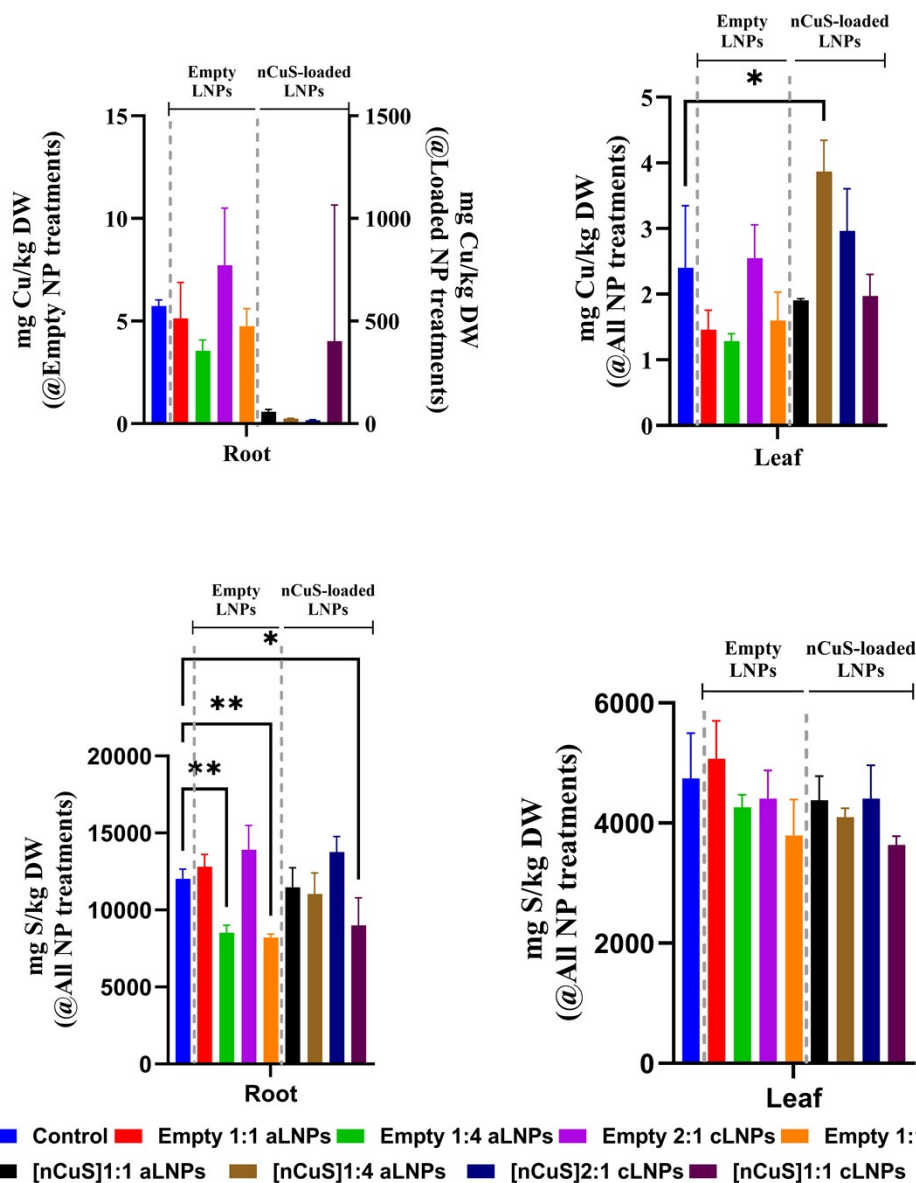

Fig. S 1 Cu and S concentrations of dry lettuce leaf and root tissue exposed to 50 mg/L of empty and nCuS-loaded anionic and cationic NPs under hydroponic cultivation. The data represent mean + SD (n = 3) with significant differences determined by one-way ANOVA followed by Dunnett's post-hoc test. (\* = p < 0.05, \*\* = p < 0.01, \*\*\* = p < 0.001, \*\*\*\* = p < 0.0001)

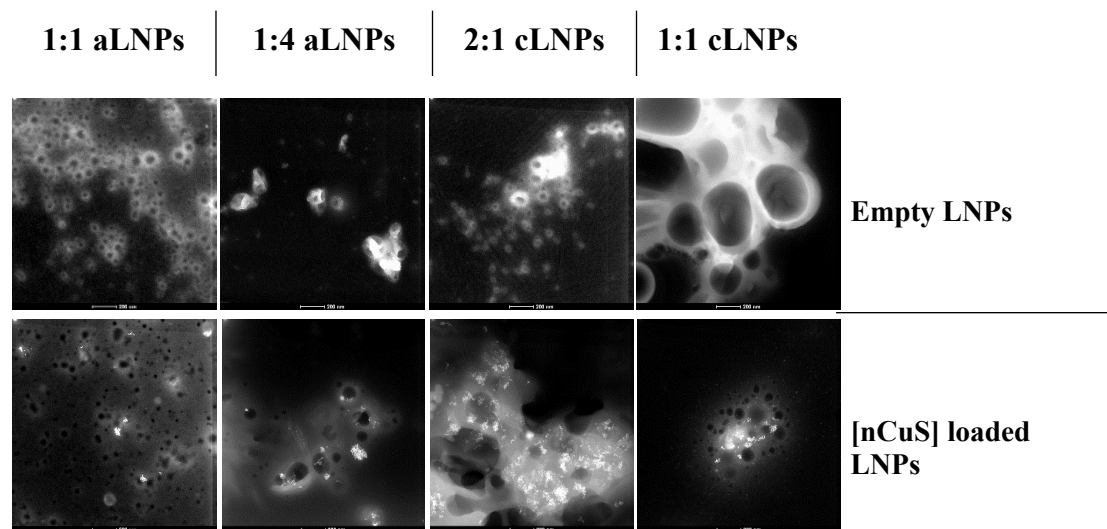

Fig. S 2 High-resolution S/TEM imaging showing spherical core-shell structures of empty and nCuS-loaded anionic and cationic nanoparticles at 56kx magnification. All scale bars represent 200 nm in the HAADF images.

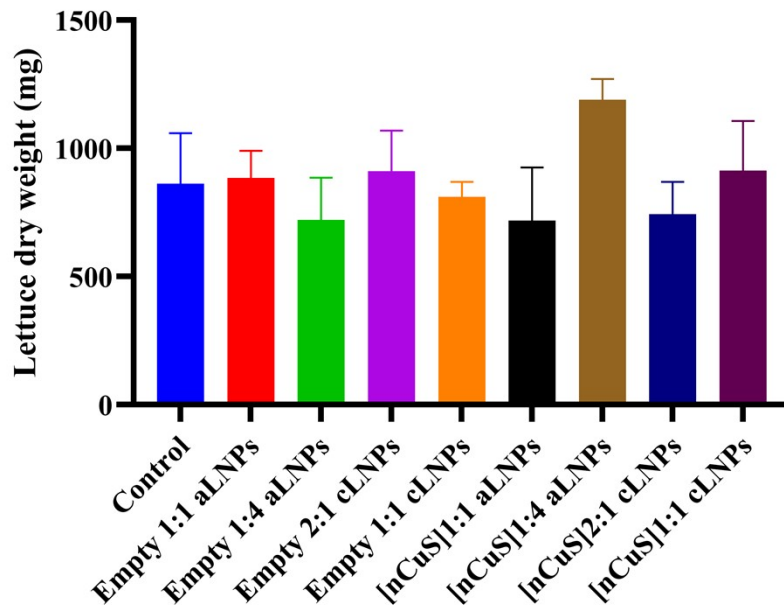

Fig. S 3 Lettuce biomass reported as dry weight showing no significant difference from the control (n=3)

Table S 1 Recipe of nutrient solution adapted for the hydroponic growth of lettuce plants

| Chemical name                                                                                                                                                                                         | Molar mass M (g/mol) | Volume of solution (L) | Mass of chemical for a 1 L volume of nutrient solution |
|-------------------------------------------------------------------------------------------------------------------------------------------------------------------------------------------------------|----------------------|------------------------|--------------------------------------------------------|
| Potassium nitrate                                                                                                                                                                                     | 101.1                | 1                      | 202.206                                                |
| Potassium silicate                                                                                                                                                                                    | 154.28               |                        | 128.616                                                |
| Potassium dihydrogen phosphate                                                                                                                                                                        | 136.09               |                        | 54.43                                                  |
| Calcium nitrate tetrahydrate                                                                                                                                                                          | 236.15               |                        | 354.225                                                |
| Magnesium sulfate heptahydrate                                                                                                                                                                        | 246.48               |                        | 197.184                                                |
| Nitric acid                                                                                                                                                                                           | 63.01                |                        | 63.013 (41.73 $\mu\text{L}^{**}$ )                     |
| Boric acid                                                                                                                                                                                            | 61.83                |                        | 2.473                                                  |
| Ethylenediaminetetraacetic acid, iron (III) monosodium salt (EDTA)                                                                                                                                    | 367.05               |                        | 3.56                                                   |
| 2-(N-morpholino) ethane sulfonic acid                                                                                                                                                                 | 213.2                |                        | 976.2                                                  |
| Copper (II) sulfate                                                                                                                                                                                   |                      |                        | No Cu here                                             |
| <b>Prepare the following chemicals and add them all to 100 mL of distilled water. In order to make the complete Hoagland's solution, you must add 1 mL of this solution to the 1 L solution above</b> |                      |                        |                                                        |
| Manganese (II) chloride tetrahydrate                                                                                                                                                                  | 197.9                | 0.1                    | 59.37                                                  |
| Zinc (II) chloride                                                                                                                                                                                    | 136.28               |                        | 40.89                                                  |
| Nickel (II) chloride hexahydrate                                                                                                                                                                      | 237.71               |                        | 1.296                                                  |
| Sodium molybdate nonahydrate                                                                                                                                                                          | 240.18               |                        | 2.06                                                   |
| <b>1/ Adjust pH to 5.8 – 6.0</b>                                                                                                                                                                      |                      |                        |                                                        |
| <b>2/ Stir properly and check pH</b>                                                                                                                                                                  |                      |                        |                                                        |

Table S 2 Leaf humidity and leaf temperature of leaves of hydroponically grown and nanoparticle-treated lettuce

| Parameter             | Plant leaf    | Treatment |                 |                 |                 |                 |                 |                 |                 |                 |
|-----------------------|---------------|-----------|-----------------|-----------------|-----------------|-----------------|-----------------|-----------------|-----------------|-----------------|
|                       |               | Control   | Empty 1:1 aLNPs | [nCuS]1:1 aLNPs | Empty 1:4 aLNPs | [nCuS]1:4 aLNPs | Empty 2:1 cLNPs | [nCuS]2:1 cLNPs | Empty 1:1 cLNPs | [nCuS]1:1 cLNPs |
| Leaf humidity (RH%)   | Outer leaves  | 45.3±3.4  | 43.3±4.6        | 42.6±3.4        | 42.4±4.4        | 45.8±4.3        | 43.4±3.3        | 46.4±4.8        | 43.9±43.9       | 48.2±5.4        |
|                       | Middle leaves | 53.8±4.3  | 53.1±5.9        | 50.8±4.2        | 51.3±6.3        | 52.8±3.2        | 47.6±4.1**      | 50.3±3.2        | 50.6±4.2        | 52.8±5.4        |
|                       | Inner leaves  | 51.9±3.0  | 50.6±4.2        | 50.7±3.9        | 46.9±3.3**      | 52.0±3.3        | 47.3±2.7*       | 53.9±4.1        | 53.4±4.8        | 51.6±3.3        |
| Leaf temperature (°C) | Outer leaves  | 21.7±0.8  | 23.3±0.1        | 23.3±0.3        | 25.0±0.1        | 25.3±           | 25.3±0.1        | 25.8±0.4        | 24.8±0.1        | 24.9±0.1        |
|                       | Middle leaves | 21.8±0.8  | 23.3±0.1        | 23.3±0.3        | 25.0±0.1        | 25.3±0.1        | 25.3±0.1        | 25.9±0.4        | 24.8±0.1        | 24.9±0.1        |
|                       | Inner leaves  | 21.9±0.8  | 23.3±0.1        | 23.3±0.3        | 25.0±0.1        | 25.3±0.1        | 25.3±0.1        | 25.9±0.3        | 24.8±0.1        | 24.9±0.1        |

Values are means ± SD (n = 12). Asterisk indicates significant difference from the control according to one-way ANOVA followed by Dunnett's post-hoc test (\* = p < 0.05, \*\* = p < 0.01, \*\*\* = p < 0.001)

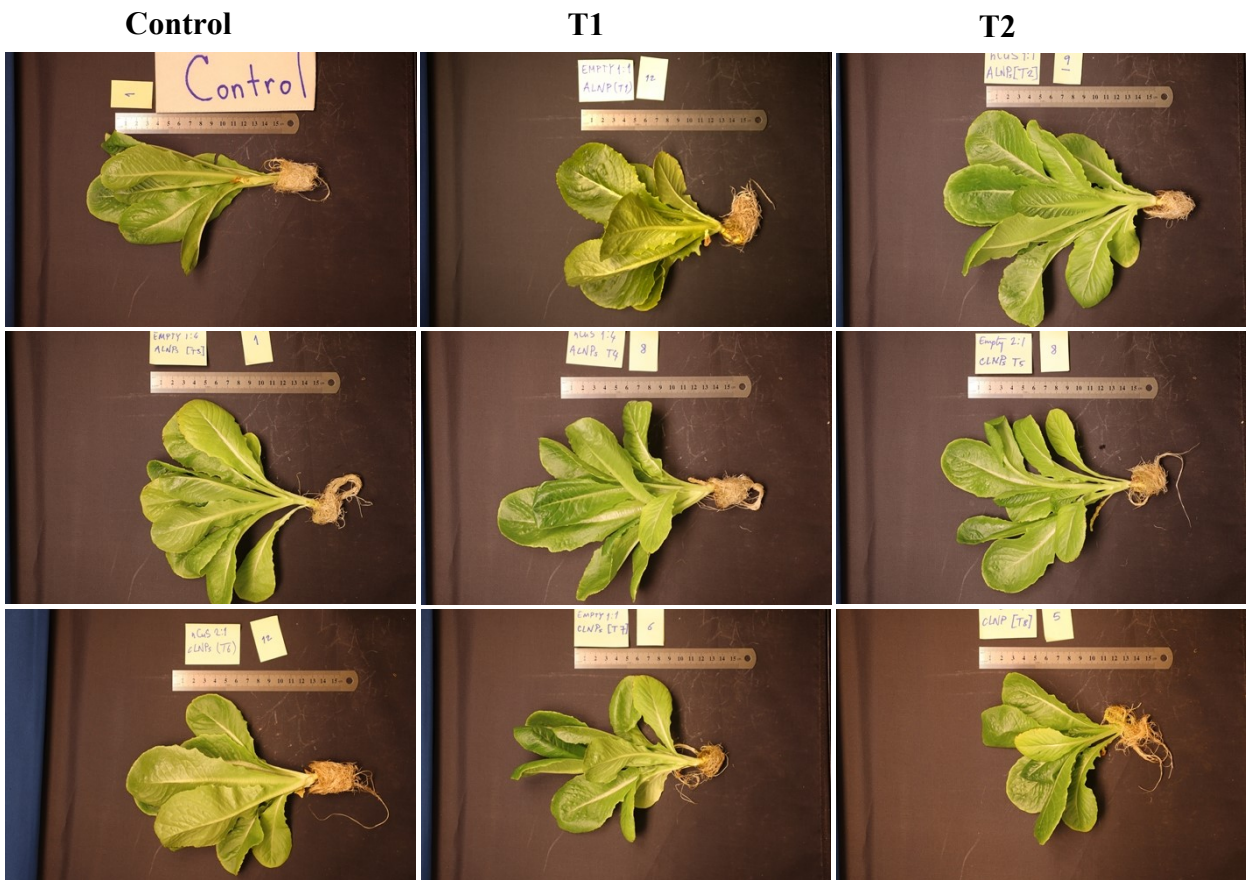

Fig. S 4 Photos of lettuce plants from the control and treated groups

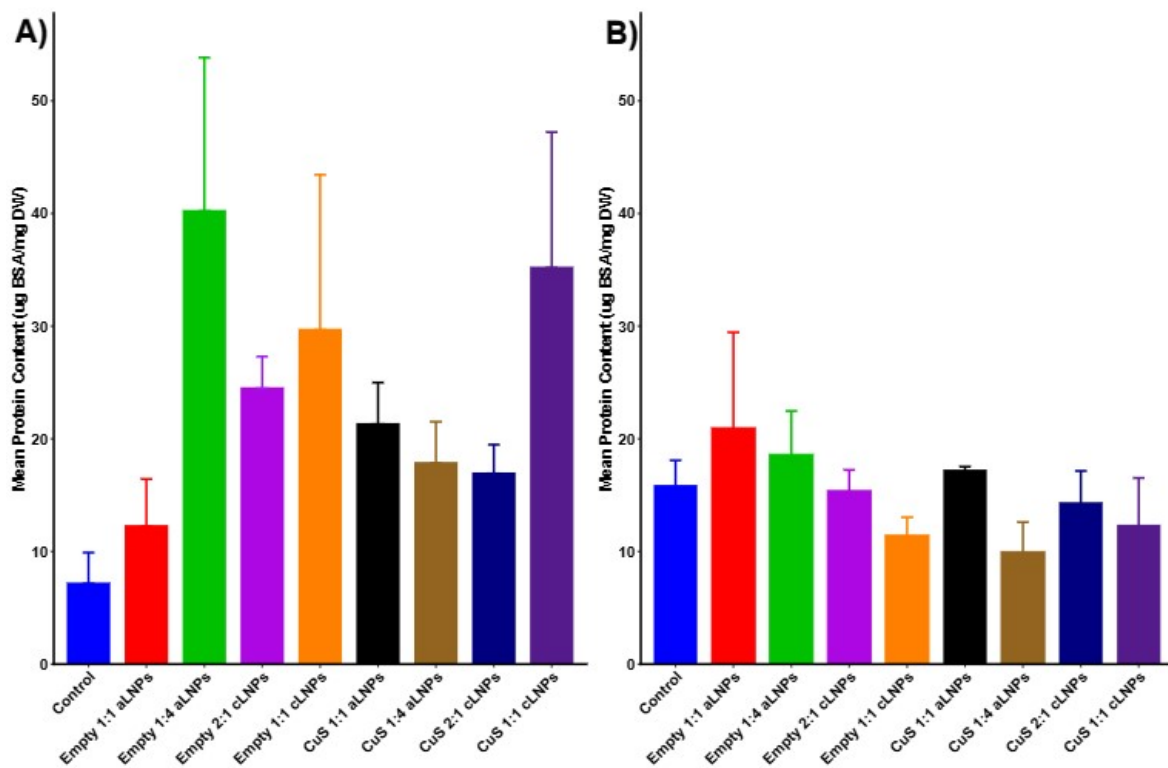

Fig. S 5 Bar charts depicting mean protein content based on a Bradford Protein Assay. Protein content was measured by comparison to a bovine serum albumin calibration curve and colorimetric analysis measured at 562 nm. Bars above plots indicate standard error. A) Mean protein content for leaf tissue. B) Mean protein content for root tissue. No significant differences between the controls and nanoparticles were detected based on ANOVA and Tukey's Honest Significant Differences Test at a significance threshold of  $p < 0.05$ .
